# Supplementary material for: A rare potassium-rich zirconium fluorophosphonate with high Eu3+ adsorption capacities from acidic solutions
Source: Royal Society of Chemistry journal article supplement (doi:10.1039/d2dt01291j), 2022-01-01
Supplement: d2dt01291j1.pdf [file d2dt01291j1.pdf]

## Supporting Information

### **A rare potassium-rich zirconium fluorophosphate with high Eu<sup>3+</sup> adsorption capacities from acidic solutions**

Jiarong Zhang,<sup>‡a,b,c</sup> Long Chen,<sup>‡c</sup> Lanhua Chen,<sup>c</sup> Lei Chen,<sup>c</sup> Yugang Zhang,<sup>c</sup>  
Changlun Chen<sup>\*a,b</sup>, Zhifang Chai<sup>c</sup> and Shuao Wang<sup>\*c</sup>

*<sup>a</sup>Institute of Plasma Physics, HFIPS, Chinese Academy of Sciences, P.O. Box 1126, Hefei 230031,  
P. R. China. E-mail: clchen@ipp.ac.cn.*

*<sup>b</sup>University of Science and Technology of China, Hefei 230026, P. R. China.*

*<sup>c</sup>State Key Laboratory of Radiation Medicine and Protection, School for Radiological and  
Interdisciplinary Sciences (RAD-X) and Collaborative Innovation Center of Radiation Medicine of  
Jiangsu Higher Education Institutions, Soochow University, Suzhou 215123, China. E-mail:  
shuaowang@suda.edu.cn.*

<sup>‡</sup> These authors contributed equally to this work.

## **Table of Contents**

**S1. Experimental section**

**S2. X-ray crystallography (Table S1, Table S2)**

**S3. Bond valence sum (BVS) (Table S3)**

**S4. Comparison of Eu(III) sorption capacities of SZ-8 and other adsorbents (Table S4)**

**S5. FT-IR spectrum (Figure S1)**

**S6. Powder X-ray diffraction (PXRD) for SZ-8 after treatment with pH 1 solution (Figure S2)**

**S7. Kinetics fitting results (Figure S3)**

**S8. SEM-EDS analysis of SZ-8 before and after ion-exchange (Figure S4 - Figure S6)**

**S9. PXRD of SZ-8 after Eu<sup>3+</sup> and Sr<sup>2+</sup> adsorption (Figure S7)**

## S1. Experimental section

*Synthesis of SZ-8:* The mixture of  $\text{ZrOCl}_2 \cdot 8\text{H}_2\text{O}$  (64.4 mg, 0.2 mmol), methylenediphosphates (35.2 mg, 0.2 mmol),  $\text{HNO}_3$  (70  $\mu\text{L}$ ), HF (20  $\mu\text{L}$ ), 50 mg  $\text{KNO}_3$  and 2.5 mL mixed solvent ( $V_{\text{DMA}} : V_{\text{H}_2\text{O}}$  (mL) = 4 : 1) was added into a 10 mL stainless steel PTFE vial. Then, the vial was heated to 200 °C for 3 days and cooled to room temperature at a rate of 5 °C/h. After being washed with ethanol and deionized water, colorless crystals were finally obtained as a pure phase.

*X-ray Crystallography Studies:* Single-crystal X-ray diffraction data collections of **SZ-8** were performed on a Bruker D8-Venture diffractometer with a Turbo X-ray Source (Mo-K $\alpha$  radiation,  $\lambda = 0.71073$  Å) adopting the direct-drive rotating anode technique and a CMOS detector under 298 K. The data of **SZ-8** was collected using the program APEX3 and then processed using SAINT routine in APEX3. The structure of **SZ-8** was solved by direct methods and refined by the full-matrix least-squares on  $F^2$  using the SHELXTL.

## Characterizations and Methods

*Instrumentations:* All the Powder X-ray diffraction (PXRD) patterns were collected from 5° to 50° with a step of 0.02° on a Bruker D8 Advance diffractometer with Cu K $\alpha$  radiation ( $\lambda=1.54056$  Å) and a Lynxeye one-dimensional detector. The FT-IR spectra of **SZ-8** with KBr were recorded in the range of 4000-500  $\text{cm}^{-1}$  on a Thermo Nicolet iS50 spectrometer.

Thermogravimetric analyses were carried out on a NETZSCH STA449F3 instrument in the range of 30-900 °C under a nitrogen flow at a heating rate of 10 K/min for the dried samples of **SZ-8**. Scanning electron microscopy images and energy-dispersive spectroscopy data (SEM/EDS) were recorded on an FEI Quanta 200FEG Scanning Electron Microscope with the energy of the electron beam being 30 keV. **SZ-8** samples were directly mounted on the carbon conductive tape and then coated with Au. The concentration of nonradioactive cations in the adsorption experiments was determined by inductively coupled plasma-atomic emission spectrometry (ICP-AES, Thermo Fisher Scientific iCAP 7000) or inductively coupled plasma-mass spectrometry (ICP-MS, Thermo Finnigan high-resolution magnetic sector Element 2).

*Hydrolytic Stability Measurements:* Hydrolytic stability measurements for **SZ-8** were studied by stirring the samples in HNO<sub>3</sub> solutions with different pH values of 1 to 3 for 1 d. The solids were re-collected and dried for PXRD patterns analysis.

*γ Radiation Resistance Measurements:* γ irradiation experiment was carried out using a <sup>60</sup>Co irradiation source ( $2.22 \times 10^{15}$  Bq). **SZ-8** was irradiated at a dose rate of 1.2 kGy/h for 200 kGy in a dry and submerged state, respectively. **SZ-8** was then collected for the PXRD patterns analysis.

*Sr<sup>2+</sup> Sorption Experiments:* All the experiments were carried out at room temperature using the batch method. The solid/liquid ratio in all batch experiments was 1 g/L. In a typical ion-exchange experiment of **SZ-8**, 10 mg **SZ-8** was added into a 10 mL aqueous solution containing a certain cation (Eu<sup>3+</sup>, Sr<sup>2+</sup>, or Cs<sup>+</sup>). The mixture was kept stirring for 18 h. The concentrations were determined by inductively coupled plasma mass spectrometry (ICP-MS) and/or inductively coupled plasma-atomic emission spectrometry (ICP-AES). The solids were separated by centrifugation or filtration. The distribution coefficient  $K_d$  is given by the equation:

$$K_d = (V[(C_0 - C_e)/C_e])/m$$

The adsorption capacity was calculated by

$$q = V(C_0 - C_e)/m$$

where  $q$  is the adsorption capacity,  $V$  is the volume (mL or L) of the testing solution,  $C_0$  and  $C_e$  are the initial and equilibrium concentration of cations in the solution (ppm), and  $m$  is the amount of the **SZ-8** samples (g) used in the experiment.

*Kinetic Studies:* 40 mg of **SZ-8** material was added into a 40 mL solution containing target cations of Sr<sup>2+</sup> (~ 5 ppm) and Eu<sup>3+</sup> (~ 13 ppm) in pH 3. The mixture was stirred by a magnetic bar for the desired contact time. The concentrations as a function of time were obtained to determine the exchange kinetics line.

*pH-Dependent adsorption:* The pH-dependent adsorptions were conducted with Cs<sup>+</sup> concentration of ~ 90 ppm, Sr<sup>2+</sup> concentration of ~ 90 ppm, and Eu<sup>3+</sup> concentration of ~ 220 ppm in the pH range of 1–6.

*SZ-8 dissolution:* SZ-8 material (15 mg) was added into pH 1 solution (15 mL). The mixture was stirred by a magnetic bar for the desired contact time and then the phosphorus concentrations were determined by ICP-OES to calculate the leaching ratio.

*Selectivity experiments:* SZ-8 (10 mg) was added into pH 2 solution (10 mL) containing Eu<sup>3+</sup>, Sr<sup>2+</sup> and Cs<sup>+</sup>, which are at the initial molar rate of 1:1:1. The mixture was stirred for 12 h followed by measured the concentrations of the three cations.

## S2. X-ray crystallography

**Table S1. Crystallographic data for SZ-8.**

|                                                      |                                                             |
|------------------------------------------------------|-------------------------------------------------------------|
| CCDC No.                                             | 2168018                                                     |
| Formula                                              | $\text{K}_2\text{Zr}[\text{CH}_2(\text{PO}_3)_2]\text{F}_2$ |
| $M_r$ [g mol <sup>-1</sup> ]                         | 377.37                                                      |
| Crystal system                                       | monoclinic                                                  |
| Space group                                          | $C2/c$                                                      |
| a(Å)                                                 | 13.167(4)                                                   |
| b(Å)                                                 | 4.7846(14)                                                  |
| c(Å)                                                 | 14.094(4)                                                   |
| $\alpha$ (°)                                         | 90.00                                                       |
| $\beta$ (°)                                          | 91.147(16)                                                  |
| $\gamma$ (°)                                         | 90.00                                                       |
| V(Å <sup>3</sup> )                                   | 887.8(5)                                                    |
| Z                                                    | 2                                                           |
| $\rho_{\text{calcd}}$ (g cm <sup>-3</sup> )          | 2.823                                                       |
| M (mm <sup>-1</sup> )                                | 2.568                                                       |
| F(000)                                               | 720                                                         |
| T(K)                                                 | 296(2)                                                      |
| R1, <sup>a</sup> wR2 <sup>b</sup> (I>2 $\sigma$ (I)) | 0.0583, 0.1321                                              |
| R1, <sup>a</sup> wR2 <sup>b</sup> (all data)         | 0.1095, 0.1661                                              |

aR1 =  $\Sigma||\text{Fo}| - |\text{Fc}||/\Sigma|\text{Fo}|$ . bwR2 =  $[\Sigma w(\text{Fo}^2 - \text{Fc}^2)^2/\Sigma w(\text{Fo}^2)^2]^{1/2}$

---

**Table S2. Selected bond distances (Å) of SZ-8**

|        |          |       |          |
|--------|----------|-------|----------|
| Zr1-O2 | 2.092(5) | P1-O1 | 1.490(6) |
| Zr1-O3 | 2.092(6) | P1-O2 | 1.535(6) |
| Zr1-F1 | 1.991(6) | P1-O3 | 1.542(6) |

**S3. Bond Valence Sum (BVS) calculations**

The bond valence of a bond length  $d_{ij}$  is calculated by the most commonly adopted empirical expression:

$$v_{ij} = \exp[(R_{ij} - d_{ij})/b].$$

Here  $b$  is equal to 0.37 Å,  $d_{ij}$  is the bond length in crystals.<sup>[1]</sup>

**Table S3. BVS data of O atoms.**

| Atom | BVS value |
|------|-----------|
| O1   | 2 (P=O)   |
| O2   | 1.8628    |
| O3   | 1.8402    |



#### **S4. Comparison of Eu(III) sorption capacities of SZ-8 and other adsorbents**

**Table S4. Comparison of Eu(III) sorption capacities of SZ-8 and other adsorbents.**

| Materials   | Conditions               | $q$ (mmol/g) | References       |
|-------------|--------------------------|--------------|------------------|
| HMS         | pH = 4.0, T = 298 K      | 0.17         | 2                |
| MWCNTs      | pH = 4.3, T = 298 K      | 0.0073       | 3                |
| CNFs        | pH = 6.5, T = 298 K      | 0.599        | 4                |
| GOs         | pH = 4.5, T = 298 K      | 1.05         | 5                |
| PA/TNTs     | pH = 5.5, T = 298 K      | 0.96         | 6                |
| GO@TiP      | pH = 5.5, T = 293 K      | 0.42         | 7                |
| FJSM-SnS-3  | pH ~ 5, T = 298 K        | 0.41         | 8                |
| KMS-5       | pH = 2, T = 298 K        | 0.57         | 9                |
| <b>SZ-8</b> | <b>pH = 2, T = 298 K</b> | <b>0.73</b>  | <b>This work</b> |

## S5. FT-IR spectrum

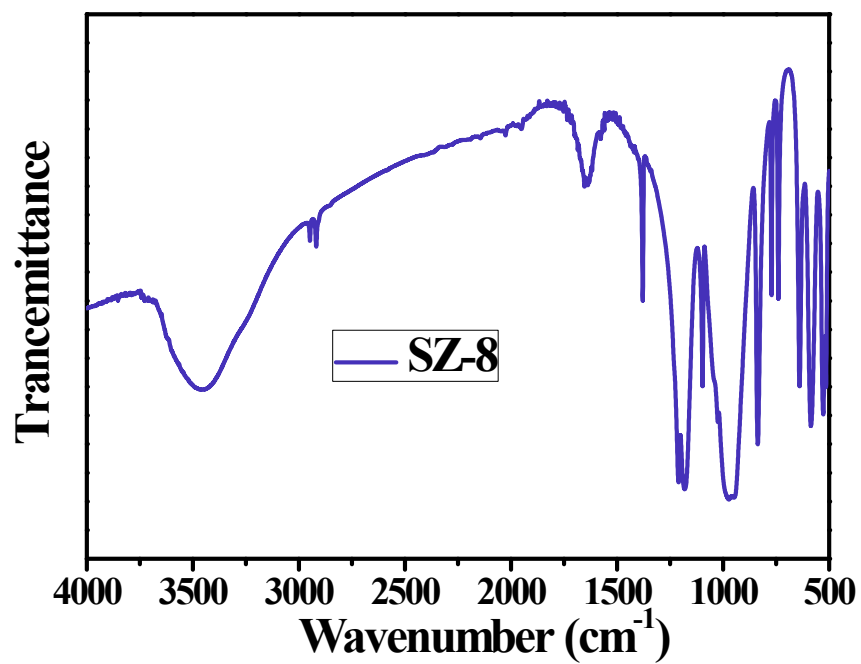

Figure S1. FT-IR spectrum of SZ-8.

**S6. Powder X-ray diffraction (PXRD) for SZ-8 after treatment with pH 1 solution**

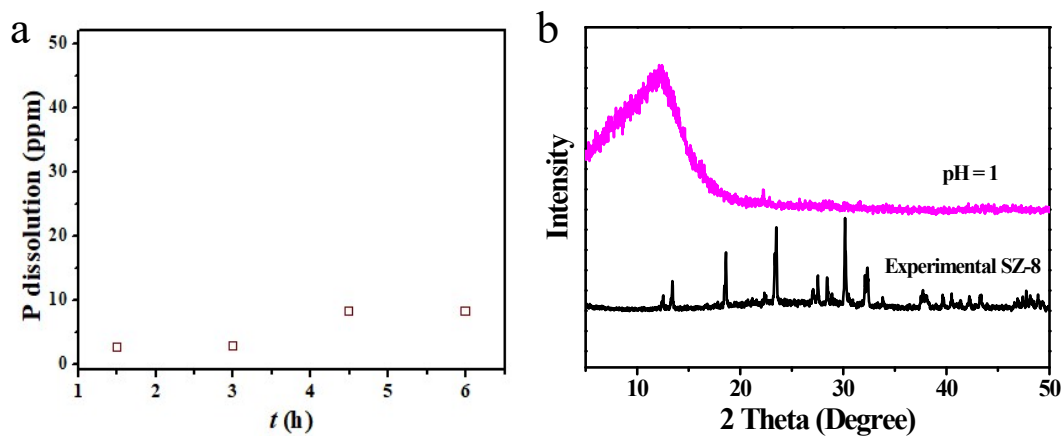

**Figure S2.** (a) The leaching phosphorus concentration in pH 1 solution under various contact time. (b) The PXRD pattern for **SZ-8** after treatment with pH 1 solution.

## S7. Kinetics fitting results

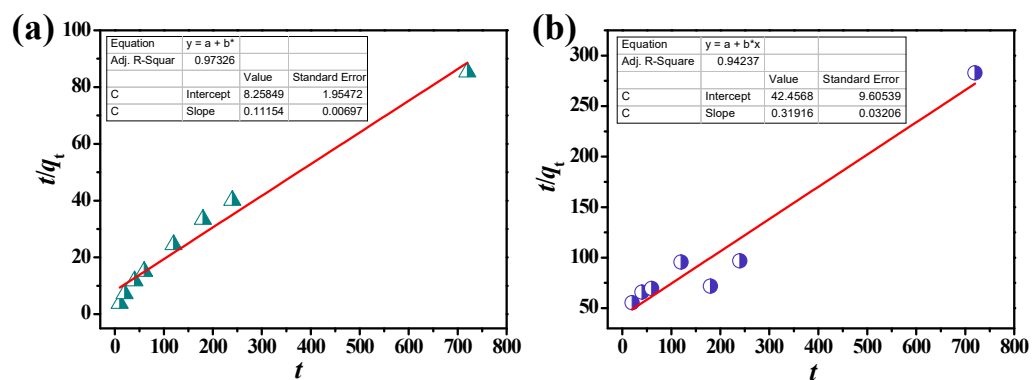

**Figure S3.** Kinetics fitting results of  $\text{Eu}^{3+}$  (a) and  $\text{Sr}^{2+}$  (b) adsorbed by SZ-8.

## S8. SEM-EDS mapping analysis

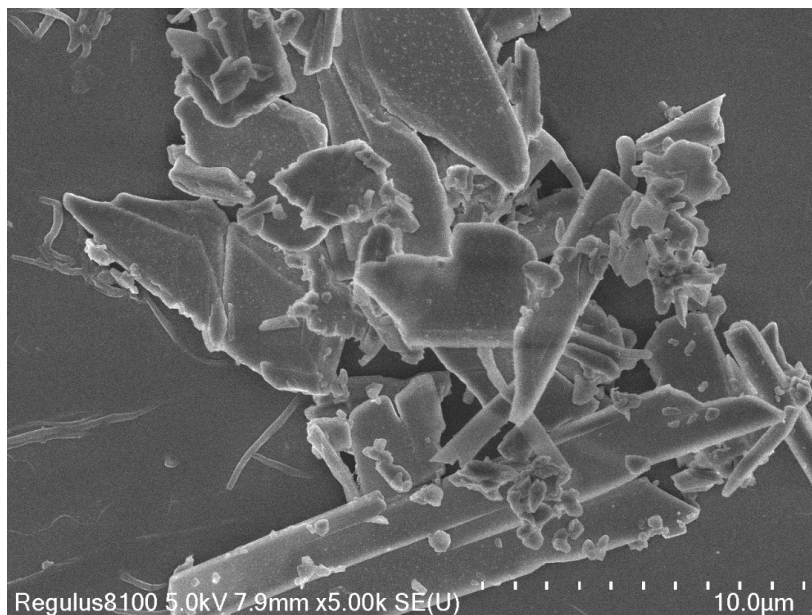

Figure S4. SEM image of SZ-8.

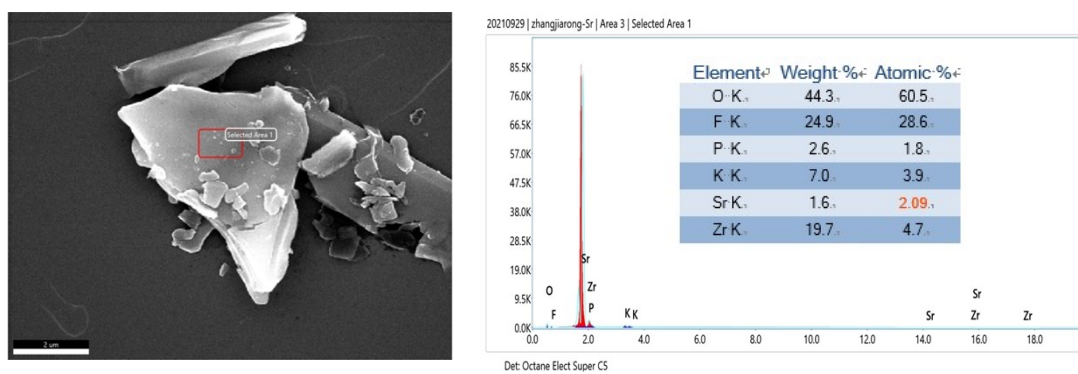

Figure S5. SEM image and EDS data of SZ-8 after Sr<sup>2+</sup> adsorption.

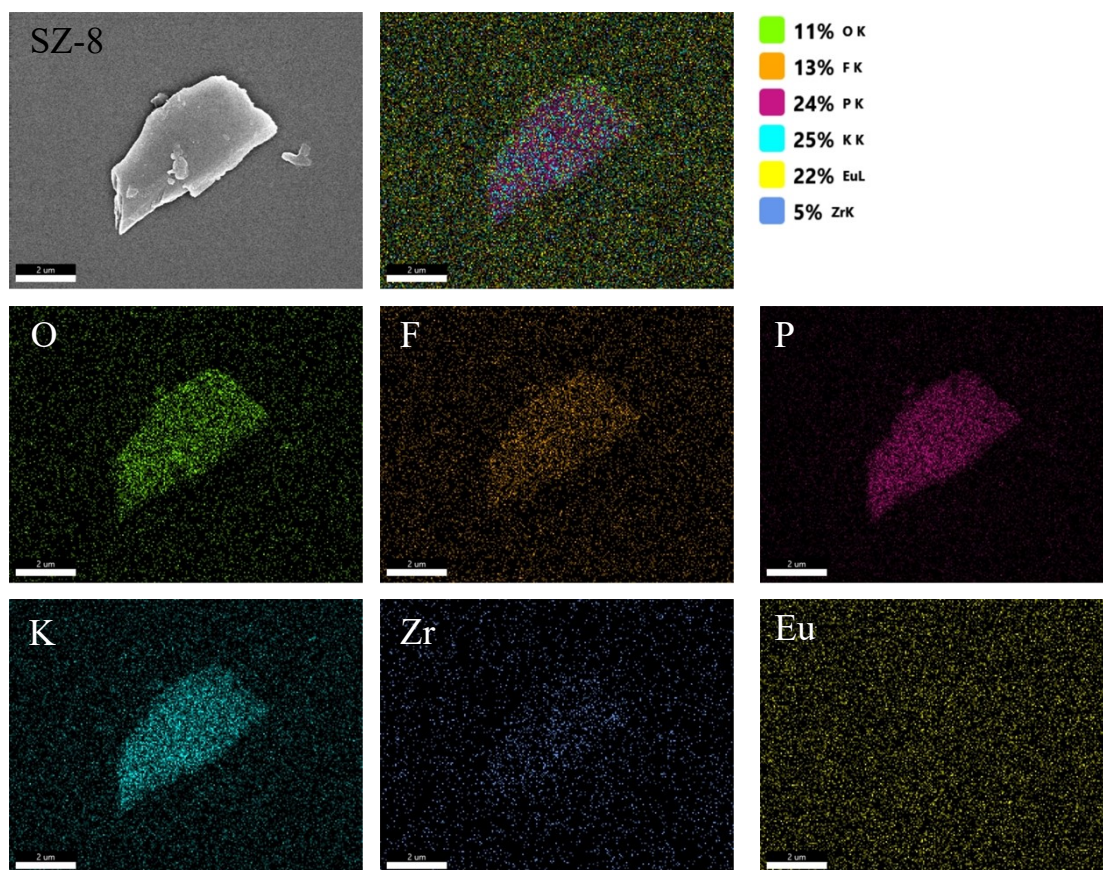

**Figure S6.** SEM analysis of **SZ-8** after  $\text{Eu}^{3+}$  adsorption.

**S9. Powder X-ray diffraction (PXRD) after  $\text{Eu}^{3+}$  and  $\text{Sr}^{2+}$  adsorption**

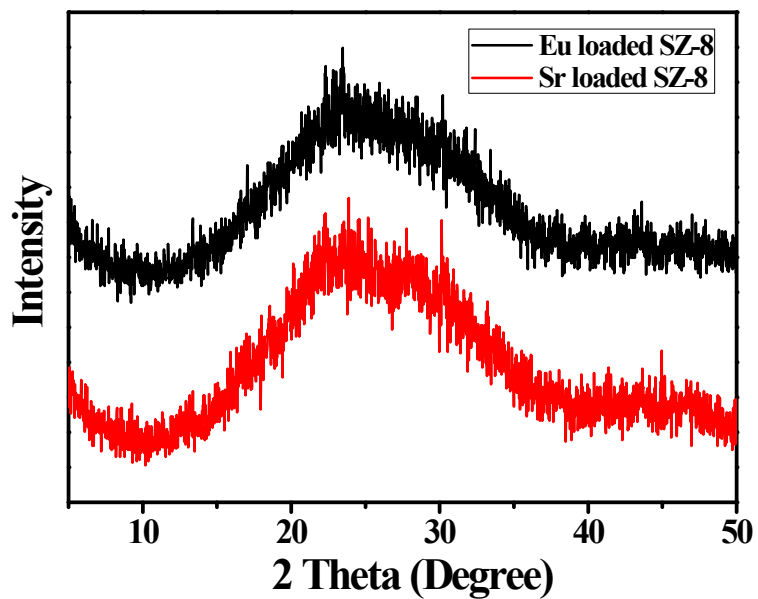

**Figure S7.** The PXRD patterns after  $\text{Eu}^{3+}$  and  $\text{Sr}^{2+}$  adsorption.

## References:

- [1] N. E. Brese and M. O’Keeffe, *Acta Cryst.* 1991, B47, 192-197.
- [2] M. Hamed, M. Holiel and I. Ahmed, *Radiochim. Acta*, 2016, **12**, 873–890.
- [3] Q. Fan, D. Shao, J. Hu, C. Chen, W. Wu and W. Wang, *Radiochim. Acta*, 2009, **97**, 141-148.
- [4] Y. Sun, Z. Wu, X. Wang, C. Ding, W. Cheng, S. Yu and X. Wang, *Environ. Sci. Technol.*, 2016, **50**, 4459-4467.
- [5] Y. Sun, Q. Wang, C. Chen, X. Tan and X. Wang, *Environ. Sci. Technol.*, 2012, **46**, 6020-6027.
- [6] C. Wu, Y. Cai, L. Xu, J. Xie, Z. Liu, S. Yang and S. Wang, *J. Mol. Liq.*, 2018, **258**, 66-73.
- [7] C. Li, Y. Huang and Z. Li, *J. Mater. Chem. A*, 2014, **2**, 14979-14985.
- [8] W. Li, J. Li, B. Zhang, H. -Y. Sun, J. Jin, X. Huang and M. Feng, *ACS Appl. Mater. Interfaces*, 2021, **13**(8), 10191-10201.
- [9] C. Xiao, Z. H. Fard, D. Sarma, T. B. Song, C. Xu and M. G. Kanatzidis, *J. Am. Chem. Soc.*, 2017, **139**(46), 16494-16497.
